# Supplementary material for: Impact of tumor multiplicity on the prognosis of patients with primary renal cell carcinoma: a SEER database analysis
Source: PubMed Central journal article supplement (PMC11330414; doi:10.1007/s10238-024-01433-w), 2024-08-17
Supplement: 10238_2024_1433_MOESM1_ESM.pdf [file 10238_2024_1433_MOESM1_ESM.pdf]

*Impact of Tumor Multiplicity on the Prognosis of Patients with Primary Renal Cell Carcinoma: A SEER Database Analysis*

Tianyue Yang<sup>†1</sup>, Hongfeng Zheng<sup>†1</sup>, Shaojun Chen<sup>†1</sup>, Min Gong<sup>†2</sup>, Yifan Liu<sup>1</sup>, Wang Zhou<sup>1</sup>, Jianqing Ye<sup>\*1</sup>, Xiuwu Pan<sup>\*1</sup>, Xingang Cui<sup>\*1</sup>

<sup>1</sup>Department of Urology, Xinhua Hospital, School of Medicine, Shanghai Jiao Tong University, 1665 Kongjiang Road, Shanghai, China, 200092

<sup>2</sup>Department of Urology, Seventh People's Hospital of Shanghai University of Traditional Chinese Medicine, Shanghai, China, 200137

*†These authors contributed equally to this paper.*

*\*Corresponding Authors:*

\*Xin-gang Cui, Mailing address:1665 Kongjiang Road, Yangpu District, Shanghai, China,200092, Xinhua Hospital, School of Medicine, Shanghai Jiao Tong University; Telephone number: 021-25078090; Fax number: 021-65795173; E-mail address: [cuxingang@xinhumed.com.cn](mailto:cuxingang@xinhumed.com.cn); ORCID: 0000-0002-0920-9439

\*Xiuwu Pan, Mailing address:1665 Kongjiang Road, Yangpu District, Shanghai, China,200092, Xinhua Hospital, School of Medicine, Shanghai Jiao Tong University; Telephone number: 021-25078090; Fax number: 021-65795173; Email: [panxiuwu@126.com](mailto:panxiuwu@126.com);

\*Jianqing Ye, Mailing address:1665 Kongjiang Road, Yangpu District, Shanghai, China,200092, Xinhua Hospital, School of Medicine, Shanghai Jiao Tong University; Telephone number: 021-25078090; Fax number: 021-65795173; Email: [ye910@126.com](mailto:ye910@126.com)

**Supplemental Figure 1**

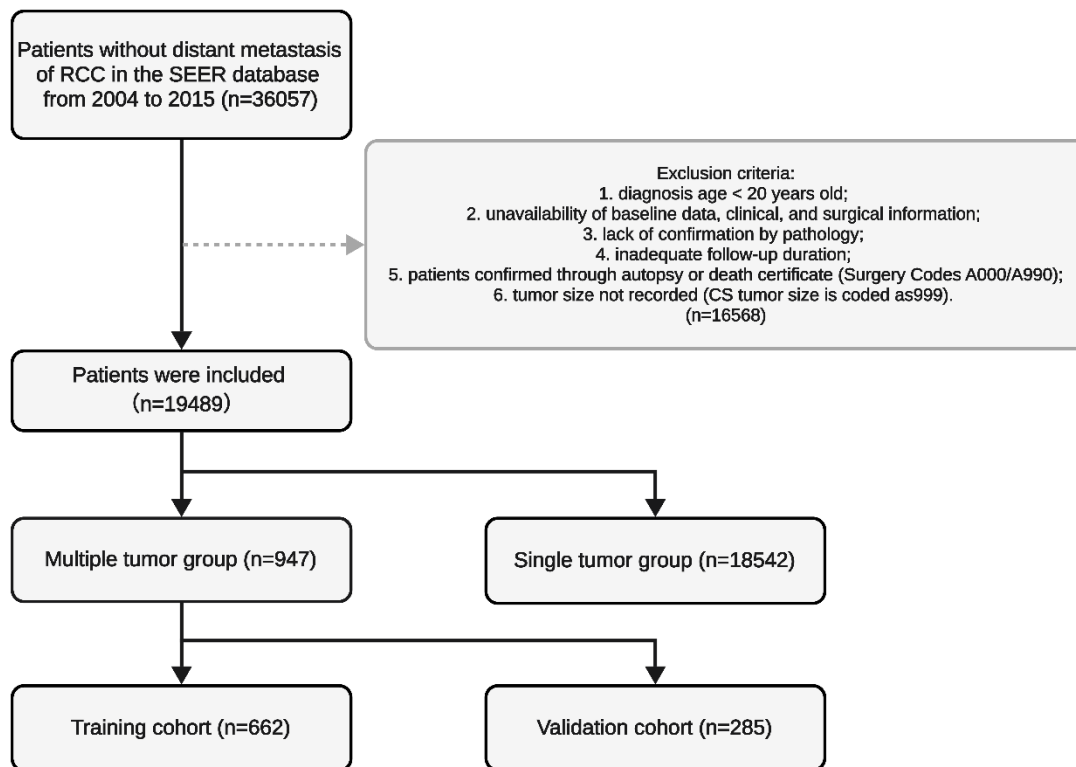

The flowchart of patient selection.
