# Supplementary material for: Impact of tumor multiplicity on the prognosis of patients with primary renal cell carcinoma: a SEER database analysis
Source: PubMed Central journal article supplement (PMC11330414; doi:10.1007/s10238-024-01433-w), 2024-08-17
Supplement: 10238_2024_1433_MOESM4_ESM.pdf [file 10238_2024_1433_MOESM4_ESM.pdf]

*Impact of Tumor Multiplicity on the Prognosis of Patients with Primary Renal Cell Carcinoma: A SEER Database Analysis*

Tianyue Yang<sup>†1</sup>, Hongfeng Zheng<sup>†1</sup>, Shaojun Chen<sup>†1</sup>, Min Gong<sup>†2</sup>, Yifan Liu<sup>1</sup>, Wang Zhou<sup>1</sup>, Jianqing Ye<sup>\*1</sup>, Xiuwu Pan<sup>\*1</sup>, Xingang Cui<sup>\*1</sup>

<sup>1</sup>Department of Urology, Xinhua Hospital, School of Medicine, Shanghai Jiao Tong University, 1665 Kongjiang Road, Shanghai, China, 200092

<sup>2</sup>Department of Urology, Seventh People's Hospital of Shanghai University of Traditional Chinese Medicine, Shanghai, China, 200137

*†These authors contributed equally to this paper.*

*\*Corresponding Authors:*

\*Xin-gang Cui, Mailing address:1665 Kongjiang Road, Yangpu District, Shanghai, China,200092, Xinhua Hospital, School of Medicine, Shanghai Jiao Tong University; Telephone number: 021-25078090; Fax number: 021-65795173; E-mail address: [cuixingang@xinhumed.com.cn](mailto:cuixingang@xinhumed.com.cn); ORCID: 0000-0002-0920-9439

\*Xiuwu Pan, Mailing address:1665 Kongjiang Road, Yangpu District, Shanghai, China,200092, Xinhua Hospital, School of Medicine, Shanghai Jiao Tong University; Telephone number: 021-25078090; Fax number: 021-65795173; Email: [panxiuwu@126.com](mailto:panxiuwu@126.com);

\*Jianqing Ye, Mailing address:1665 Kongjiang Road, Yangpu District, Shanghai, China,200092, Xinhua Hospital, School of Medicine, Shanghai Jiao Tong University; Telephone number: 021-25078090; Fax number: 021-65795173; Email: [ye910@126.com](mailto:ye910@126.com)

**Supplemental Figure 2 Comparison of survival outcomes among subgroups using the Kaplan-Meier method**

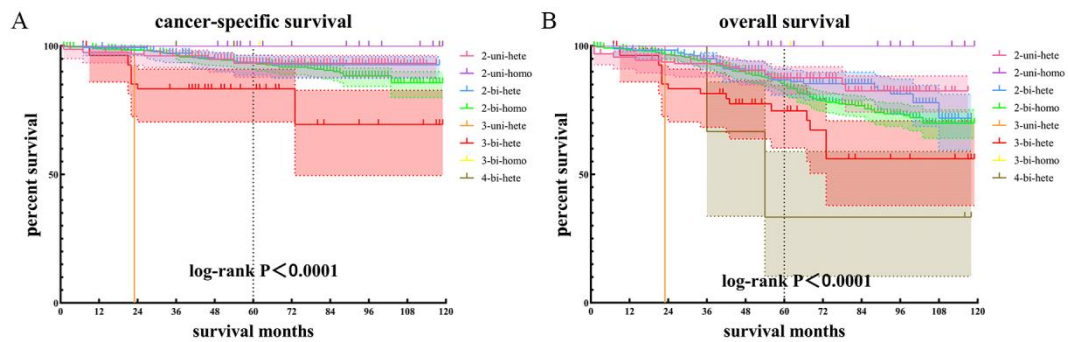

A, Cancer-specific survival. B, Overall survival.

The pink line represents patients with two-unilateral-heterogeneity tumors (n=82, 17.83%).

The purple line represents patients with two-unilateral-homogeneity tumors (n=8, 1.74%).

The blue line represents patients with two-bilateral-heterogeneity tumors (n=91, 19.78%).

The green line represents patients with two-bilateral-homogeneity tumors (n=255, 55.43%).

The orange line represents patients with three-unilateral-heterogeneity tumors (n=1, 0.22%).

The red line represents patients with three-bilateral-heterogeneity tumors (n=19, 4.13%).

The yellow line represents patients with three-bilateral-homogeneity tumors (n=1, 0.22%).

The brown line represents patients with four-bilateral-heterogeneity tumors (n=3, 0.65%).
